# Supplementary material for: Enzymatic Modification of Native Chitin and Conversion to Specialty Chemical Products
Source: PubMed Central journal article supplement (PMC7073968; doi:10.3390/md18020093), 2020-01-30
Supplement: marinedrugs-18-00093-s001.pdf [file marinedrugs-18-00093-s001.pdf]

## Supplementary data

Table 1: Preparative methods to separate COS according to physiochemical properties.

| Methods to recover and isolate chitin derivatives                                                                                                                              | COS length (DP), or weight       | Product quantity                                 | Specifics                                                                                                                                                        | Reference                                                                                         |
|--------------------------------------------------------------------------------------------------------------------------------------------------------------------------------|----------------------------------|--------------------------------------------------|------------------------------------------------------------------------------------------------------------------------------------------------------------------|---------------------------------------------------------------------------------------------------|
| Gel permeation chromatography (GPC) coupled with HPLC for analysis                                                                                                             | DP 2 – 6                         | < 2 g                                            | Separation according to $M_w$ -dependent retention time using a pullulan standard.                                                                               | (Choi, Ahn, Lee, Byun, & Park, 2002)                                                              |
| Ultrafiltration                                                                                                                                                                | 5 – 30 kDa                       |                                                  | High weight chitosan was fractionated.                                                                                                                           | (S. A. Lopatin, Derbeneva, Kulikov, Varlamov, & Shpigun, 2009)                                    |
| Capillary electrophoresis                                                                                                                                                      | DP 2 - 6                         | < 5 $\mu$ M                                      | Very low detection limit, requires derivatisation with fluorescence marker.                                                                                      | (Hattori, Anraku, & Kato, 2010)                                                                   |
| Nanofiltration                                                                                                                                                                 | DP 6 - 8                         | 16 L of < 5 % chitosan                           | Large scale preparative method, able to yield up to 82,2 % pure COS.                                                                                             | (H. Dong et al., 2014)                                                                            |
| Immobilised metal anion chromatography (IMAC)                                                                                                                                  | DP 2 - 4                         | < 40 mg                                          | 60 – 95 % yield with 95 % (DP 2 -3) and 90% (DP 4) purity.                                                                                                       | (Le Dévédec et al., 2008)                                                                         |
| High performance liquid chromatography (HPLC)<br>With amino-column + UV/RI detector<br>With reversed-phase column + UV detector<br>With carbohydrate-column + UV detector      | DP 2 - 6<br>DP 2 – 7<br>DP 1 - 8 | NA<br>300 mg/ml<br>< 2,2 mg/ml                   | UV detector: GlcN only detectable through coupling of a chromophore. RI-detector: GlcN and GlcNAc, low sensitivity. Generally: expensive, limited to low DP COS. | (Lv et al., 2016)<br>(Sergey A. Lopatin et al., 1995)<br>(Jung, Souleimanov, Park, & Smith, 2007) |
| Hydrophilic interaction chromatography (HILIC) coupled with an evaporative light-scattering detector (ELSD)<br>HILIC with weak cation exchange chromatography mixed mode (WCX) | DP 2 - 6<br>DP 2 - 6             | 5 ml of 100 mg/ml<br>5 $\mu$ l                   | High $M_w$ chitosan is insoluble in organic solvents, no large scale application. Resolution of ion exchange columns drops with increasing DP of COS.            | (M. Jiang et al., 2014)<br>(X. Dong, Shen, Gou, Chen, & Liang, 2012)                              |
| Size exclusion chromatography (SEC)                                                                                                                                            | DP 4 – 20                        | 200 mg                                           | COS separation independent of $P_A$ and $D_D$ .                                                                                                                  | (Sørbotten, Horn, Eijsink, & Vårum, 2005)                                                         |
| Ion-exchange chromatography (IEX)<br>High performance an-ionic exchange chromatography with pulsed amperometric detection (HAPAEC PAD)                                         | DP 5<br>DP 1 - 6<br>DP 1 - 5     | 20 $\mu$ g<br>< 10 mg/L<br>3 ml of 0,5% chitosan | Separation of $D_2A_3$ isobars according to $P_A$ . GlcN with DP < 6, no acetylated glucosamine detection.                                                       | (Haebel, Bahrke, & Peter, 2007)<br>(Cao et al., 2016)<br>(Santos-Moriano, Woodley, & Plou, 2016)  |
| Immobilised lysozyme affinity chromatography                                                                                                                                   | Mixture with DP 22 in average    | 20 mg                                            | Acetyl-group dependent interaction, separates GlcN from GlcNAc.                                                                                                  | (Sasaki, Kristiansen, Fukamizo, & Vårum, 2003)                                                    |

**Table 2: Analytical methods to analyse physiochemical properties or sequences of COS.**

| Methods to analyse and identify COS                                                                                                 | COS length (DP), or weight                           | Product quantity                              | Specifics                                                                                                                                                                                                                           | Reference                                                                                                                                        |
|-------------------------------------------------------------------------------------------------------------------------------------|------------------------------------------------------|-----------------------------------------------|-------------------------------------------------------------------------------------------------------------------------------------------------------------------------------------------------------------------------------------|--------------------------------------------------------------------------------------------------------------------------------------------------|
| UHPLC coupled to an evaporative light scattering detector (ELSD) and an electrospray ionization mass spectrometry (ESI-MS detector) | DP 1 - 6                                             | 1 $\mu$ l of 1 mM solution                    | Information about the pattern of acetylation ( $P_A$ ) within the COS.                                                                                                                                                              | (Hamer et al., 2015)                                                                                                                             |
| Mass spectroscopy coupled with a hybrid QTOF analyser                                                                               | DP 1 - 4                                             | NA                                            | The DP, but not the $P_A$ is retrieved.                                                                                                                                                                                             | (Santos-Moriano et al., 2016)                                                                                                                    |
| The matrix-assisted laser desorption/ionization time-of-flight mass spectrometry (MALDI-TOF MS)                                     | DP 3 - 6<br>DP 3 - 7                                 | 1 $\mu$ l<br>1 $\mu$ L of 0,5 g/L COS         | Information about DP and residue distribution within COS of consistent DP as function of $D_A$ .                                                                                                                                    | (Doan, Tran, Nguyen, Nguyen, & Wang, 2018)<br>(Trombotto, Ladavière, Delolme, & Domard, 2008)                                                    |
| $^1\text{H}$ NMR<br>$^{13}\text{C}$ NMR                                                                                             | DP 2<br>DP 30 in average<br>< 28,7 kg/mol<br>NA      | 15 mg/ml<br>In DCI<br>NA<br>5 and 50 mg<br>NA | Information about $F_A$ ( $^1\text{H}$ NMR) and $P_A$ ( $^{13}\text{C}$ NMR); the frequency and nature of diads and triads is obtained. No definitive structure, but models of statistical distribution of diads can be calculated. | (Einbu & Vårum, 2007)<br>(Martinou, Bouriotis, Stokke, & Vårum, 1998)<br>(Weinhold, Sauvageau, Kumirska, & Thöming, 2009)<br>(Paul et al., 2015) |
| Acid-base titration with bromocresol green and first order derivative UV spectroscopy                                               | DP 2 – 20 with $\leq 1$ kDa and $\leq 3$ kDa samples | 0,5 g and 0.1 g respectively                  | Information about degree of deacetylation ( $D_D$ ) of COS.                                                                                                                                                                         | (Y. Jiang et al., 2017)                                                                                                                          |
